# Supplementary material for: Metabolic and Immune Markers for Precise Monitoring of COVID-19 Severity and Treatment
Source: PubMed Central journal article supplement (PMC8790058; doi:10.3389/fimmu.2021.809937), 2022-01-12

# Supplementary Figure 1

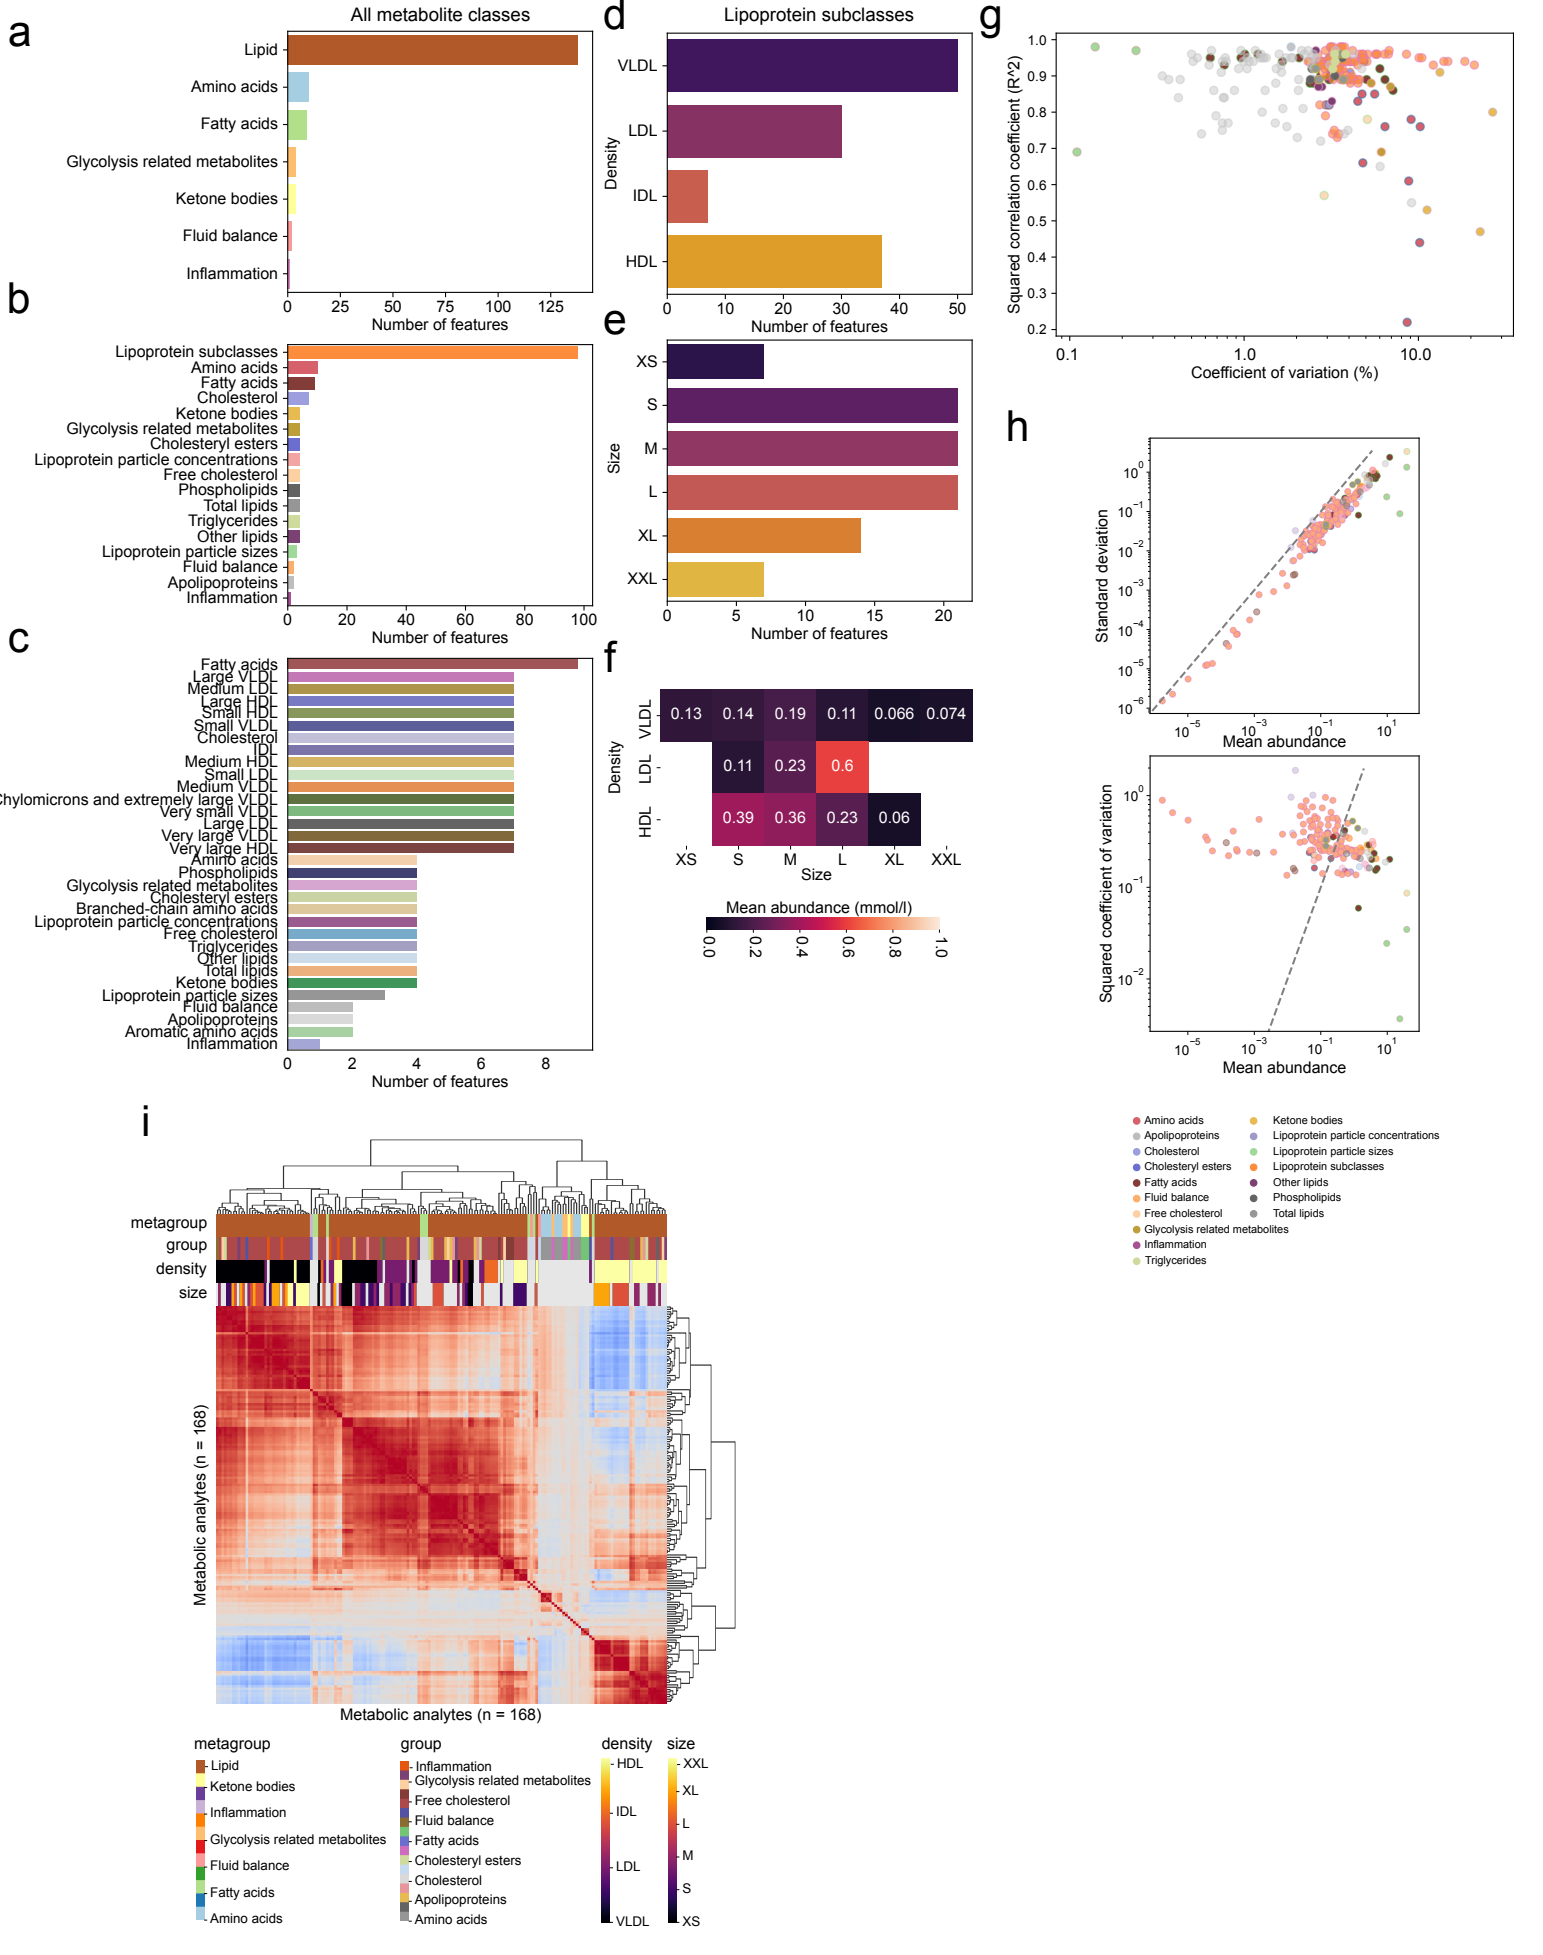

Supplement: Image_1.pdf [file Image_1.pdf]
