# Supplementary material for: Metabolic and Immune Markers for Precise Monitoring of COVID-19 Severity and Treatment
Source: PubMed Central journal article supplement (PMC8790058; doi:10.3389/fimmu.2021.809937), 2022-01-12

# Supplementary Figure 4

**a**

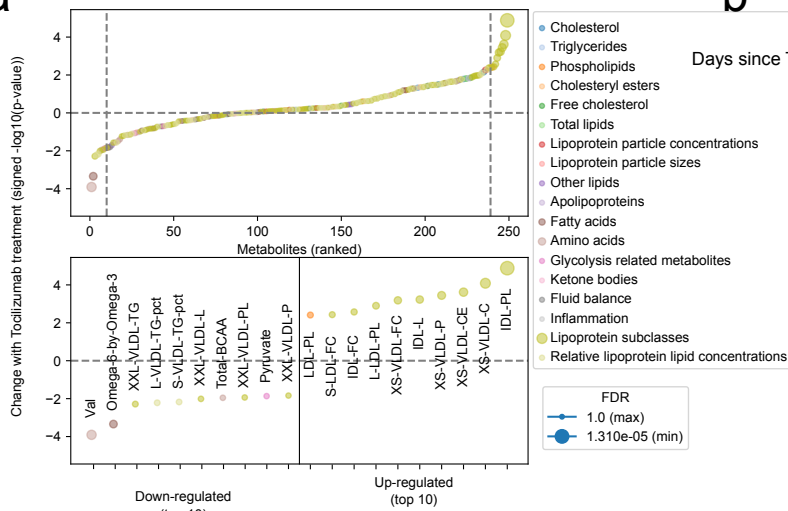

**b**

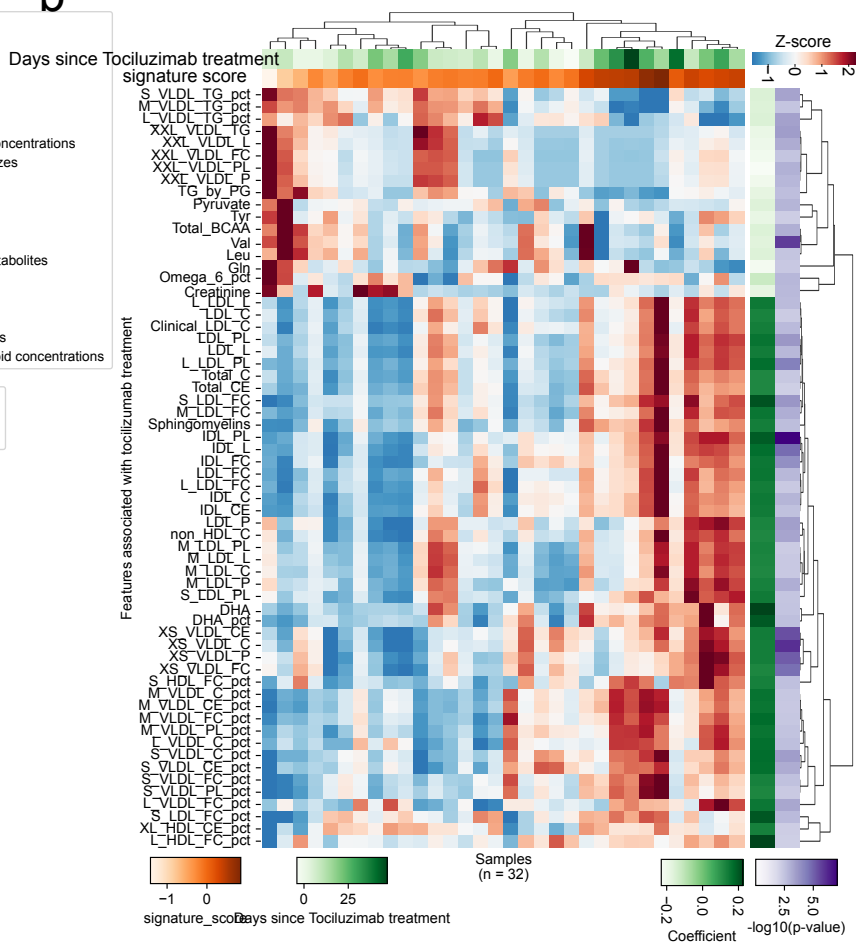

**c**

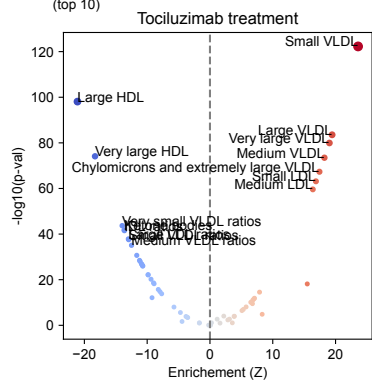

**d**

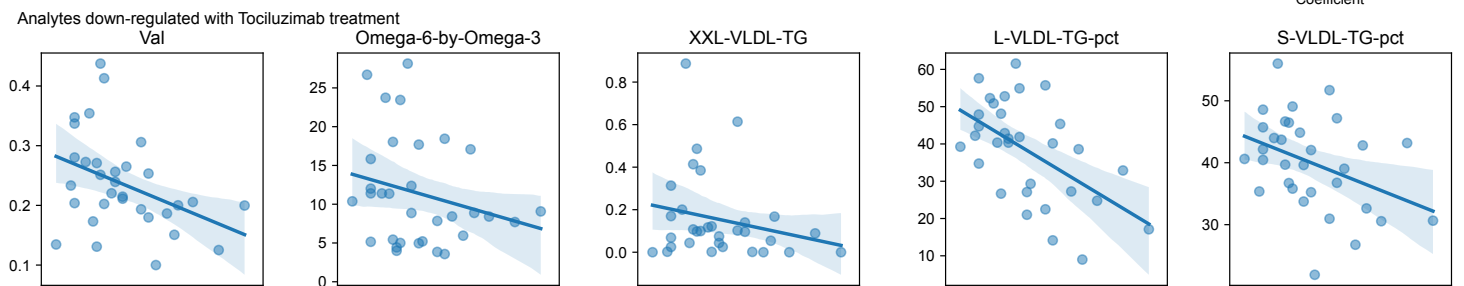

**e**

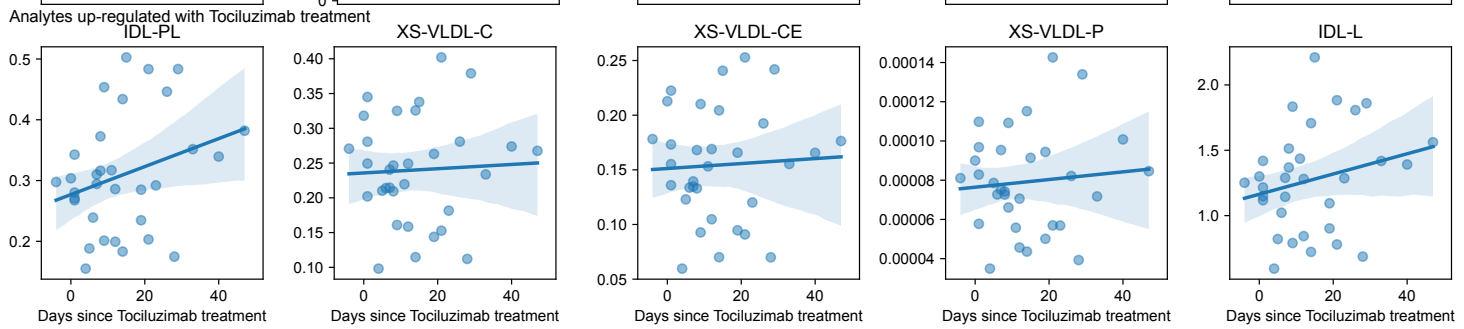

**f**

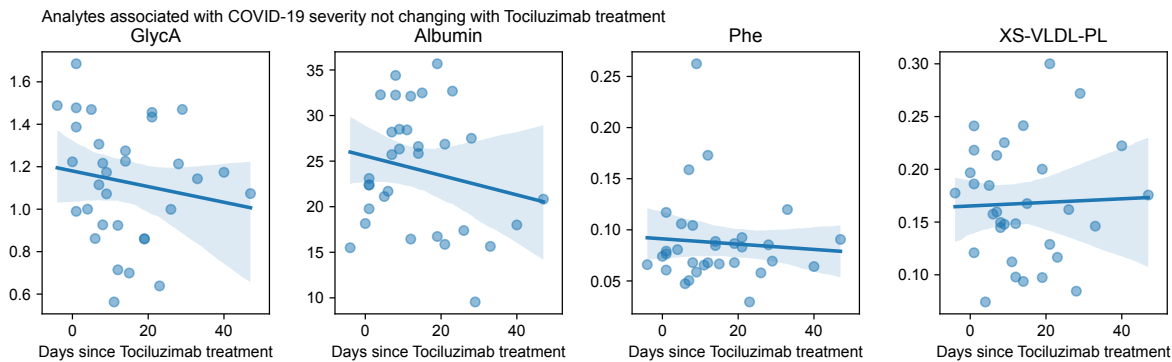

Supplement: Image_4.pdf [file Image_4.pdf]
